# Supplementary material for: Theoretical study on the reaction mechanism of reverse water–gas shift reaction using a Rh–Mo6S8cluster
Source: Royal Society of Chemistry journal article supplement (doi:10.1039/c6ra23855f), 2016-01-01
Supplement: c6ra23855f1.pdf [file c6ra23855f1.pdf]

## Theoretical Study on the Reaction Mechanism of Reverse Water-Gas Shift Reaction using Rh-Mo<sub>6</sub>S<sub>8</sub> cluster

[supporting information]

Zhaoru Cao, Ling Guo\*, Naying Liu, Xiaoli Zheng, Wenli Li, Yayin Shi, Juan Guo, Yaru Xi

School of Chemistry and Material Science, School of Modern Arts and Sciences, Shanxi Normal University,

Linfen 041004, China

**Figure S1** Combined free energy profile of redox mechanism for RWGS reaction on Rh-Mo<sub>6</sub>S<sub>8</sub> and Ti-Mo<sub>6</sub>S<sub>8</sub> clusters including reaction intermediates and transition states.

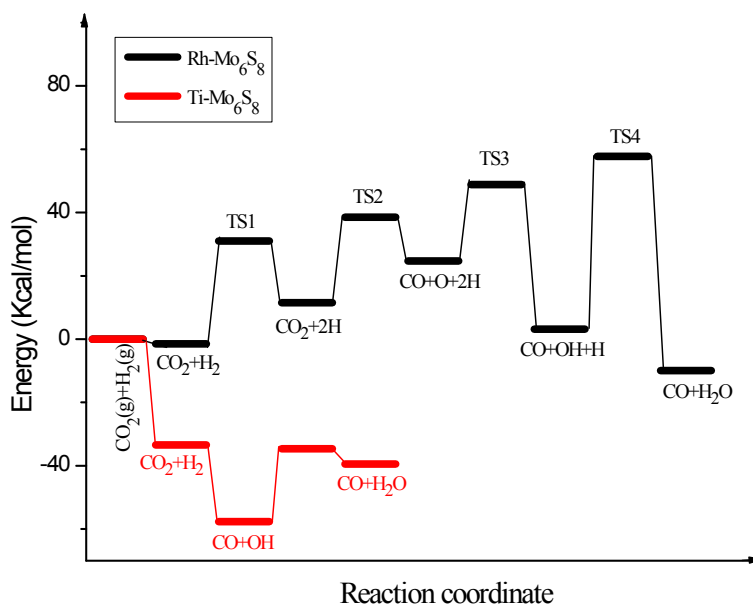

**Figure S2** Combined free energy profile of carboxyl mechanism (HOCO intermediate ) for RWGS reaction on Rh-Mo<sub>6</sub>S<sub>8</sub>, K-Mo<sub>6</sub>S<sub>8</sub> and Mo<sub>6</sub>S<sub>8</sub> clusters including reaction intermediates and transition states.

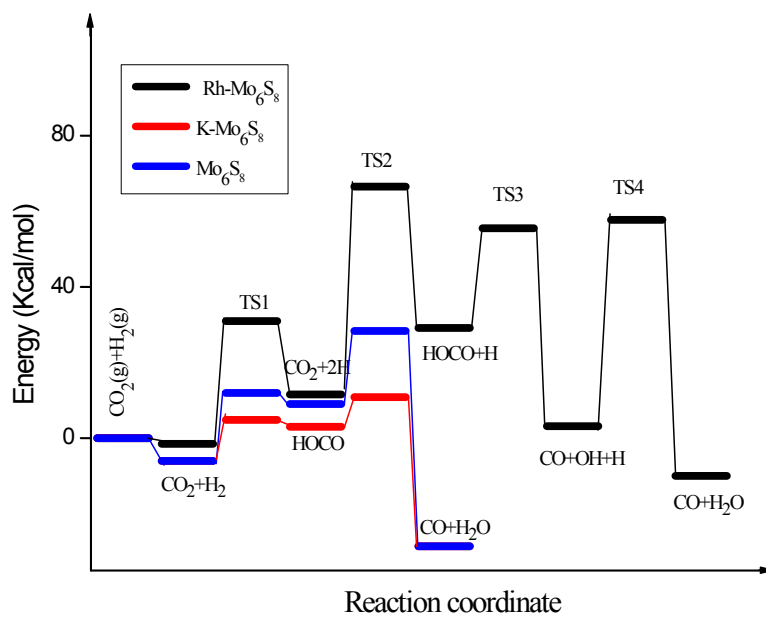

**Table S1.** Calculated binding Energies (BE) and Vibrational Frequencies of Gas Phase and Adsorbed Species at their Preferred Adsorption Site.

| species           | Preferred adsorption site | BE/eV | frequencies/cm <sup>-1</sup>                                       |
|-------------------|---------------------------|-------|--------------------------------------------------------------------|
| H <sub>2</sub>    | gas                       |       | 4646                                                               |
| CO                | gas                       |       | 2439                                                               |
| CO <sub>2</sub>   | gas                       |       | 2585,1518,745,745                                                  |
| H <sub>2</sub> O  | gas                       |       | 4187,4069,1827                                                     |
| HOCO              | gas                       |       | 4095,2125,1390,1207,683,545                                        |
| HCOOH             | gas                       |       | 4041,3319,2035,1552,1440,1274,1192,715,691                         |
| H*                | S-Mo bridge               | -1.31 | 2401,552,537                                                       |
| O*                | S-Mo bridge               | -5.65 | 685,462                                                            |
| OH*               | Mo-top                    | -2.28 | 3747,762,667,198,194                                               |
| H <sub>2</sub>    | Mo-top                    | -0.08 | 4057,821,461                                                       |
| H <sub>2</sub> O* | Mo-top                    | -0.67 | 3817,3706,1656,611,443,136,87,70                                   |
| CO*               | Mo-top                    | -0.52 | 2122, 397,65,46                                                    |
| CO <sub>2</sub> * | Rh-top                    | -0.14 | 1905,1211,697,576,341,331,257,169,155,151,146,124,93               |
| HOCO*             | Mo-top                    | -1.22 | 3717,1540,1319,1205,725,646,480,393,299,192,188,128,104,42,57      |
| HCOO              | Mo-top,Rh-top             | -2.74 | 3105,1575,1394,1369,1045,775,414,315,315,160,150,137,126,109,91,65 |
| CHO               | Mo-top                    | -0.83 | 2977,1519,1308,813,544,221,145,115                                 |
| HCOOH*            | Rh-top                    | -0.43 | 3480,3167,1737,1419,1376,1218,1048,726,672,146,133,112,84,59,46,23 |

**Table S2.** DFT Calculated free energy barrier ( $E_a$ ) and Reaction Energies ( $\Delta G$ ) of Elementary Reaction Steps; the Imaginary Vibrational Frequency ( $w$ ) of the Transition State for Each Elementary Reaction Step.

| Mechanism | Reaction no. | Elementary steps                    | $E_a$ | $\Delta G$ | $w$      |
|-----------|--------------|-------------------------------------|-------|------------|----------|
| A         | R1           | $H_2 \rightarrow H^* + H^*$         | 32.51 | 13.05      | -136.81  |
|           | R2           | $CO_2 \rightarrow CO^* + O^*$       | 26.99 | 13.21      | -581.60  |
|           | R3           | $O^* + H^* \rightarrow OH^*$        | 24.07 | -21.60     | -1316.63 |
|           | R4           | $OH^* + H^* \rightarrow H_2O^*$     | 54.61 | -13.10     | -594.30  |
| B         | R5           | $H_2 \rightarrow 2H^*$              | 32.51 | 13.05      | -136.81  |
|           | R6           | $CO_2^* + H^* \rightarrow HOCO^*$   | 55.02 | 17.62      | -1078.73 |
|           | R7           | $HOCO^* \rightarrow CO^* + OH^*$    | 26.37 | -26.01     | -55.42   |
|           | R8           | $OH^* + H^* \rightarrow H_2O^*$     | 54.61 | -13.10     | -594.30  |
| C         | R9           | $H_2 \rightarrow H^* + H^*$         | 32.51 | 13.05      | -136.81  |
|           | R10          | $CO_2^* + H^* \rightarrow HCOO^*$   | 46.36 | 5.07       | -529.12  |
|           | R11          | $HCOO^* + H^* \rightarrow HCOOH^*$  | 21.92 | -19.36     | -1114.85 |
|           | R12          | $HCOOH^* \rightarrow CO^* + H_2O^*$ | 27.69 | -5.75      | -1108.64 |
| D         | R13          | $HCOOH^* \rightarrow HCO^* + OH^*$  | 76.01 | 33.87      | -155.26  |
|           | R14          | $HCO^* \rightarrow CO^* + H^*$      | 13.34 | -27.97     | -542.66  |
|           | R15          | $OH^* + H^* \rightarrow H_2O^*$     | 54.61 | -13.10     | -594.30  |

cartesian coordinates and the absolute energy values of all the optimized intermediates:

Mechanism A:

CO<sub>2</sub>+H<sub>2</sub>: -3890.605895 a.u.

|    |           |           |           |
|----|-----------|-----------|-----------|
| Mo | 2.148030  | -0.891623 | -0.270225 |
| Mo | 1.537209  | 1.456402  | 0.654110  |
| Mo | 0.493225  | -0.728676 | 1.746306  |
| Mo | -0.446238 | -1.490136 | -0.652581 |
| Mo | 0.748807  | 0.705390  | -1.712635 |
| Mo | -1.019202 | 1.169521  | 0.198004  |
| S  | -1.735949 | -0.008809 | -2.117089 |
| S  | 1.264842  | -1.620800 | -2.443698 |
| S  | 3.088021  | 1.165847  | -1.240134 |
| S  | 0.143877  | 2.930300  | -0.850930 |
| S  | -0.417431 | 1.364876  | 2.481259  |
| S  | 2.826646  | -0.207307 | 2.006264  |
| S  | 1.170919  | -2.904469 | 0.692735  |
| S  | -1.747094 | -1.870907 | 1.341253  |
| Rh | -3.070708 | -0.636928 | -0.176232 |
| C  | -3.749831 | 1.210984  | 0.334512  |
| O  | -4.913076 | 0.859403  | 0.323873  |
| O  | -2.998992 | 2.182651  | 0.487022  |
| H  | 2.754089  | 2.861660  | 1.746078  |
| H  | 2.325106  | 3.341206  | 1.330452  |

Ts1: -3890.554085a.u.

|    |           |           |           |
|----|-----------|-----------|-----------|
| Mo | 2.148784  | -0.941687 | -0.178181 |
| Mo | 1.599885  | 1.529322  | 0.427357  |
| Mo | 0.571972  | -0.473401 | 1.818349  |
| Mo | -0.479942 | -1.552013 | -0.444303 |
| Mo | 0.720455  | 0.443934  | -1.792666 |
| Mo | -1.012415 | 1.098094  | 0.153231  |
| S  | -1.749674 | -0.304718 | -2.110685 |
| S  | 1.212288  | -1.953926 | -2.209794 |
| S  | 3.073188  | 0.999424  | -1.430583 |
| S  | 0.025115  | 2.806376  | -1.239385 |
| S  | -0.247588 | 1.747099  | 2.273760  |
| S  | 2.917792  | 0.142867  | 1.948402  |
| S  | 1.138732  | -2.780003 | 1.058354  |
| S  | -1.750718 | -1.538686 | 1.611121  |
| Rh | -3.111668 | -0.649226 | -0.117589 |
| C  | -3.749265 | 1.235025  | 0.256235  |
| O  | -4.930736 | 0.954345  | 0.247945  |
| O  | -2.951161 | 2.177897  | 0.373238  |
| H  | 1.644242  | 3.116049  | 1.295967  |
| H  | 0.978349  | 3.357638  | -0.249362 |

CO<sub>2</sub>+2H: -3890.585098a.u.

|    |           |           |           |
|----|-----------|-----------|-----------|
| Mo | 2.132999  | -0.968211 | -0.034665 |
| Mo | 1.666176  | 1.539074  | 0.101197  |
| Mo | 0.593296  | -0.108060 | 1.849187  |
| Mo | -0.499534 | -1.623796 | -0.106142 |
| Mo | 0.649471  | 0.103482  | -1.849883 |
| Mo | -0.956369 | 1.067665  | 0.027462  |
| S  | -1.737576 | -0.729892 | -2.001514 |
| S  | 1.162466  | -2.339952 | -1.809280 |
| S  | 3.041633  | 0.676454  | -1.680988 |
| S  | -0.063281 | 2.509741  | -1.785255 |
| S  | -0.125256 | 2.282875  | 2.029265  |
| S  | 2.987950  | 0.479099  | 1.816744  |
| S  | 1.137038  | -2.529362 | 1.549969  |
| S  | -1.754122 | -1.018841 | 1.885328  |
| Rh | -3.164622 | -0.658348 | -0.030426 |
| C  | -3.713766 | 1.263366  | 0.056461  |
| O  | -4.914736 | 1.070947  | 0.057199  |
| O  | -2.870865 | 2.181089  | 0.083473  |
| H  | 0.968761  | 3.070039  | 1.683961  |
| H  | 1.011339  | 3.250776  | -1.307799 |

TS2: -3890.542098a.u.

|    |           |           |           |
|----|-----------|-----------|-----------|
| Mo | 2.687318  | -0.277993 | 0.120383  |
| Mo | 1.655613  | 1.987210  | 0.901613  |
| Mo | 0.794714  | -0.354406 | 1.940436  |
| Mo | 0.278386  | -1.231257 | -0.431443 |
| Mo | 1.220969  | 1.095923  | -1.480948 |
| Mo | -0.852129 | 1.546734  | 0.284452  |
| S  | -1.045726 | 0.230092  | -1.919521 |
| S  | 2.113986  | -1.106670 | -2.140804 |
| S  | 3.434838  | 1.857133  | -0.842267 |
| S  | 0.238079  | 3.257572  | -0.758664 |
| S  | -0.253230 | 1.703963  | 2.642550  |
| S  | 3.025519  | 0.541084  | 2.408855  |
| S  | 1.938199  | -2.398017 | 1.063117  |
| S  | -1.233130 | -1.725149 | 1.418314  |
| Rh | -2.494420 | -0.466500 | -0.110411 |
| C  | -3.687291 | 1.026843  | 0.417608  |
| O  | -4.801075 | 1.280613  | 0.665838  |
| O  | -2.631481 | 2.389317  | 0.507025  |
| H  | 0.612847  | 2.792381  | 2.630825  |
| H  | 1.043621  | 4.051489  | 0.065453  |

CO+O+2H: -3890.564055a.u.

|    |           |           |           |
|----|-----------|-----------|-----------|
| Mo | 2.048508  | -0.985370 | -0.246405 |
| Mo | 1.638202  | 1.398309  | 0.578477  |
| Mo | 0.469834  | -0.696900 | 1.770837  |
| Mo | -0.568793 | -1.567919 | -0.611210 |
| Mo | 0.642416  | 0.593915  | -1.716369 |
| Mo | -1.063040 | 0.929657  | 0.369103  |
| S  | -1.733808 | -0.103081 | -2.156477 |
| S  | 1.142279  | -1.755954 | -2.385061 |
| S  | 3.053279  | 1.021627  | -1.344924 |
| S  | 0.210233  | 3.058610  | -1.271570 |
| S  | -0.220772 | 1.555249  | 2.613292  |
| S  | 2.856256  | -0.147228 | 1.971294  |
| S  | 1.022400  | -2.933520 | 0.776518  |
| S  | -1.847266 | -1.588798 | 1.441465  |
| Rh | -3.233839 | -0.540717 | -0.251909 |
| C  | -3.182433 | 1.352602  | 0.662685  |
| O  | -4.224762 | 1.816914  | 0.907134  |
| O  | -1.058845 | 2.986844  | -0.286567 |
| H  | 0.899082  | 2.379834  | 2.451071  |
| H  | 1.246171  | 3.485201  | -0.434542 |

TS3: -3890.525695a.u.

|    |           |           |           |
|----|-----------|-----------|-----------|
| Mo | 1.987645  | -1.171587 | 0.256407  |
| Mo | 2.019485  | 1.632610  | -0.142480 |
| Mo | 0.282970  | 0.044213  | 1.865820  |
| Mo | -0.505352 | -1.716260 | 0.104784  |
| Mo | 0.699077  | -0.380686 | -1.778529 |
| Mo | -1.119236 | 0.886320  | -0.121284 |
| S  | -1.734014 | -0.932414 | -1.928394 |
| S  | 1.131822  | -2.771729 | -1.396615 |
| S  | 3.104502  | 0.167950  | -1.621173 |
| S  | 0.066000  | 2.083927  | -1.870031 |
| S  | -0.783793 | 2.315828  | 1.963236  |
| S  | 2.573216  | 0.846155  | 1.961287  |
| S  | 0.830761  | -2.371388 | 2.058172  |
| S  | -2.121182 | -0.782953 | 1.709094  |
| Rh | -3.524312 | -0.246067 | -0.293180 |
| C  | -3.116838 | 1.738889  | -0.282398 |
| O  | -3.974750 | 2.535260  | -0.221594 |
| O  | 2.182212  | 3.339418  | -0.660716 |
| H  | 0.201218  | 3.202800  | 1.682493  |
| H  | 1.044336  | 3.179796  | -1.503905 |

CO+OH+H: -3890.598473a.u.

|    |           |           |           |
|----|-----------|-----------|-----------|
| Mo | 1.729969  | -1.306660 | 0.355979  |
| Mo | 2.162640  | 1.283642  | -0.205963 |
| Mo | 0.145282  | 0.150341  | 1.855305  |
| Mo | -0.922109 | -1.610347 | 0.078890  |
| Mo | 0.609855  | -0.359803 | -1.759972 |
| Mo | -0.915827 | 1.127948  | -0.180602 |
| S  | -1.813354 | -0.799993 | -2.057388 |
| S  | 0.713591  | -2.832579 | -1.278843 |
| S  | 3.069029  | -0.415503 | -1.542573 |
| S  | 0.541591  | 2.210127  | -1.708282 |
| S  | -0.396013 | 2.604639  | 1.773593  |
| S  | 2.518271  | 0.472345  | 2.016504  |
| S  | 0.388449  | -2.362581 | 2.072201  |
| S  | -2.274629 | -0.559907 | 1.802349  |
| Rh | -3.306247 | -0.032419 | -0.293462 |
| C  | -2.892788 | 2.018255  | -0.426941 |
| O  | -3.825222 | 2.710801  | -0.541165 |
| O  | 3.689974  | 2.408972  | -0.468147 |
| H  | 0.755837  | 3.260866  | 1.467801  |
| H  | 4.501013  | 2.090438  | -0.899587 |

TS4: -3890.511442a.u.

|    |           |           |           |
|----|-----------|-----------|-----------|
| Mo | 1.742191  | -1.352324 | 0.107021  |
| Mo | 2.092504  | 1.278146  | 0.128883  |
| Mo | 0.066163  | -0.315595 | 1.877881  |
| Mo | -0.909782 | -1.535818 | -0.303563 |
| Mo | 0.722263  | 0.017867  | -1.764222 |
| Mo | -0.957829 | 1.229034  | -0.015694 |
| S  | -1.672209 | -0.261345 | -2.267620 |
| S  | 0.791142  | -2.475056 | -1.844069 |
| S  | 3.167166  | -0.045106 | -1.492938 |
| S  | 0.541002  | 2.564550  | -1.276861 |
| S  | -0.657253 | 1.920698  | 2.174832  |
| S  | 2.387107  | 0.095756  | 2.199734  |
| S  | 0.368630  | -2.764578 | 1.525761  |
| S  | -2.336831 | -1.161672 | 1.601159  |
| Rh | -3.174076 | 0.016361  | -0.268099 |
| C  | -2.915133 | 2.110645  | -0.109521 |
| O  | -3.925436 | 2.689151  | -0.195610 |
| O  | 3.612841  | 2.660800  | 0.291575  |
| H  | 2.141881  | 2.890199  | 1.047624  |
| H  | 3.531610  | 3.443076  | -0.286563 |



CO+H<sub>2</sub>O: -3890.619343a.u.

|    |           |           |           |
|----|-----------|-----------|-----------|
| Mo | -1.906497 | -1.193555 | 0.190565  |
| Mo | -1.535804 | 1.311228  | -0.364416 |
| Mo | -0.346873 | -0.573956 | -1.788301 |
| Mo | 0.756299  | -1.597795 | 0.415810  |
| Mo | -0.607979 | 0.275703  | 1.832828  |
| Mo | 1.114228  | 1.225513  | -0.019388 |
| S  | 1.952565  | -0.149519 | 2.046378  |
| S  | -0.860993 | -2.164012 | 2.210601  |
| S  | -3.000389 | 0.596356  | 1.484957  |
| S  | -0.222024 | 2.663620  | 1.346320  |
| S  | 0.320583  | 1.725900  | -2.218958 |
| S  | -2.737900 | -0.212883 | -1.921032 |
| S  | -0.798661 | -2.945079 | -1.075196 |
| S  | 1.966566  | -1.585343 | -1.678081 |
| Rh | 3.173152  | -0.418992 | -0.073676 |
| C  | 2.691253  | 2.603788  | -0.094373 |
| O  | 3.566850  | 3.341665  | -0.139090 |
| O  | -2.762604 | 3.174923  | -0.942690 |
| H  | -2.312580 | 3.695333  | -1.630417 |
| H  | -2.858349 | 3.759422  | -0.171592 |

Mechanism B:

CO<sub>2</sub>+H<sub>2</sub>: -3890.605895a.u.

|    |           |           |           |
|----|-----------|-----------|-----------|
| Mo | 2.148030  | -0.891623 | -0.270225 |
| Mo | 1.537209  | 1.456402  | 0.654110  |
| Mo | 0.493225  | -0.728676 | 1.746306  |
| Mo | -0.446238 | -1.490136 | -0.652581 |
| Mo | 0.748807  | 0.705390  | -1.712635 |
| Mo | -1.019202 | 1.169521  | 0.198004  |
| S  | -1.735949 | -0.008809 | -2.117089 |
| S  | 1.264842  | -1.620800 | -2.443698 |
| S  | 3.088021  | 1.165847  | -1.240134 |
| S  | 0.143877  | 2.930300  | -0.850930 |
| S  | -0.417431 | 1.364876  | 2.481259  |
| S  | 2.826646  | -0.207307 | 2.006264  |
| S  | 1.170919  | -2.904469 | 0.692735  |
| S  | -1.747094 | -1.870907 | 1.341253  |
| Rh | -3.070708 | -0.636928 | -0.176232 |
| C  | -3.749831 | 1.210984  | 0.334512  |
| O  | -4.913076 | 0.859403  | 0.323873  |
| O  | -2.998992 | 2.182651  | 0.487022  |
| H  | 2.754089  | 2.861660  | 1.746078  |
| H  | 2.325106  | 3.341206  | 1.330452  |

|                      |                  |           |           |
|----------------------|------------------|-----------|-----------|
| TS1:                 | -3890.554085a.u. |           |           |
| Mo                   | 2.148784         | -0.941687 | -0.178181 |
| Mo                   | 1.599885         | 1.529322  | 0.427357  |
| Mo                   | 0.571972         | -0.473401 | 1.818349  |
| Mo                   | -0.479942        | -1.552013 | -0.444303 |
| Mo                   | 0.720455         | 0.443934  | -1.792666 |
| Mo                   | -1.012415        | 1.098094  | 0.153231  |
| S                    | -1.749674        | -0.304718 | -2.110685 |
| S                    | 1.212288         | -1.953926 | -2.209794 |
| S                    | 3.073188         | 0.999424  | -1.430583 |
| S                    | 0.025115         | 2.806376  | -1.239385 |
| S                    | -0.247588        | 1.747099  | 2.273760  |
| S                    | 2.917792         | 0.142867  | 1.948402  |
| S                    | 1.138732         | -2.780003 | 1.058354  |
| S                    | -1.750718        | -1.538686 | 1.611121  |
| Rh                   | -3.111668        | -0.649226 | -0.117589 |
| C                    | -3.749265        | 1.235025  | 0.256235  |
| O                    | -4.930736        | 0.954345  | 0.247945  |
| O                    | -2.951161        | 2.177897  | 0.373238  |
| H                    | 1.644242         | 3.116049  | 1.295967  |
| H                    | 0.978349         | 3.357638  | -0.249362 |
| CO <sub>2</sub> +2H: | -3890.585098a.u. |           |           |
| Mo                   | 2.132999         | -0.968211 | -0.034665 |
| Mo                   | 1.666176         | 1.539074  | 0.101197  |
| Mo                   | 0.593296         | -0.108060 | 1.849187  |
| Mo                   | -0.499534        | -1.623796 | -0.106142 |
| Mo                   | 0.649471         | 0.103482  | -1.849883 |
| Mo                   | -0.956369        | 1.067665  | 0.027462  |
| S                    | -1.737576        | -0.729892 | -2.001514 |
| S                    | 1.162466         | -2.339952 | -1.809280 |
| S                    | 3.041633         | 0.676454  | -1.680988 |
| S                    | -0.063281        | 2.509741  | -1.785255 |
| S                    | -0.125256        | 2.282875  | 2.029265  |
| S                    | 2.987950         | 0.479099  | 1.816744  |
| S                    | 1.137038         | -2.529362 | 1.549969  |
| S                    | -1.754122        | -1.018841 | 1.885328  |
| Rh                   | -3.164622        | -0.658348 | -0.030426 |
| C                    | -3.713766        | 1.263366  | 0.056461  |
| O                    | -4.914736        | 1.070947  | 0.057199  |
| O                    | -2.870865        | 2.181089  | 0.083473  |
| H                    | 0.968761         | 3.070039  | 1.683961  |
| H                    | 1.011339         | 3.250776  | -1.307799 |

TS2: -3890.497413a.u.

|    |           |           |           |
|----|-----------|-----------|-----------|
| Mo | 2.203121  | -0.620216 | -0.303541 |
| Mo | 1.322083  | 1.480784  | 0.904322  |
| Mo | 0.457278  | -1.017705 | 1.583991  |
| Mo | -0.253095 | -1.562325 | -0.891981 |
| Mo | 0.693495  | 1.011414  | -1.610756 |
| Mo | -1.117271 | 0.892086  | 0.146805  |
| S  | -1.889403 | -0.176565 | -2.025501 |
| S  | 1.456672  | -1.091346 | -2.622840 |
| S  | 2.911368  | 1.693210  | -0.912411 |
| S  | -0.152919 | 3.177569  | -0.318531 |
| S  | -0.778868 | 0.955147  | 2.645414  |
| S  | 2.690621  | -0.168374 | 2.100088  |
| S  | 1.580780  | -2.861220 | 0.298799  |
| S  | -1.477669 | -2.543736 | 0.902568  |
| Rh | -2.918730 | -0.888199 | 0.017325  |
| C  | -3.065736 | 1.820314  | 0.104155  |
| O  | -4.002333 | 0.959571  | -0.039751 |
| O  | -3.117905 | 3.056345  | 0.294228  |
| H  | -1.614131 | 3.340334  | 0.050875  |
| H  | 0.028313  | 2.094926  | 2.616088  |

HOCO+H: -3890.557025a.u.

|    |           |           |           |
|----|-----------|-----------|-----------|
| Mo | 2.271428  | -0.460936 | -0.004988 |
| Mo | 1.023593  | 1.460233  | 1.124210  |
| Mo | 0.098232  | -1.161129 | 1.416423  |
| Mo | 0.121252  | -1.412411 | -1.199470 |
| Mo | 0.897169  | 1.222766  | -1.430557 |
| Mo | -1.239931 | 0.954589  | -0.037985 |
| S  | -1.485185 | 0.026706  | -2.279955 |
| S  | 2.066584  | -0.733977 | -2.464121 |
| S  | 2.948991  | 1.890075  | -0.275849 |
| S  | -0.230452 | 3.132911  | -0.191046 |
| S  | -1.271586 | 0.667569  | 2.545922  |
| S  | 2.143388  | -0.289102 | 2.474709  |
| S  | 1.749399  | -2.769662 | 0.248676  |
| S  | -1.202253 | -2.860525 | 0.297410  |
| Rh | -2.693711 | -1.139865 | -0.033015 |
| C  | -3.323826 | 1.574063  | -0.078566 |
| O  | -4.056860 | 0.560751  | -0.047739 |
| O  | -3.931050 | 2.757835  | -0.108516 |
| H  | -3.237087 | 3.441230  | -0.135147 |
| H  | -0.415052 | 1.504987  | 3.209702  |

TS3: -3890.515007a.u.

|    |           |           |           |
|----|-----------|-----------|-----------|
| Mo | 2.276125  | -0.485120 | -0.206573 |
| Mo | 1.142929  | 1.683642  | 0.732132  |
| Mo | 0.541308  | -0.857755 | 1.623411  |
| Mo | -0.113114 | -1.655114 | -0.728835 |
| Mo | 0.614035  | 0.795985  | -1.665231 |
| Mo | -1.402298 | 1.025316  | 0.139480  |
| S  | -1.675534 | -0.203070 | -2.103594 |
| S  | 1.633694  | -1.310921 | -2.449437 |
| S  | 2.796599  | 1.766678  | -1.041417 |
| S  | -0.277562 | 2.904727  | -0.930412 |
| S  | -0.970055 | 0.710789  | 2.683401  |
| S  | 2.600096  | 0.343460  | 2.161153  |
| S  | 1.772249  | -2.736705 | 0.569004  |
| S  | -1.345653 | -2.459608 | 1.199159  |
| Rh | -2.761895 | -1.290025 | -0.210876 |
| C  | -3.447915 | 1.623718  | -0.039017 |
| O  | -4.546947 | 1.943319  | -0.119137 |
| O  | -2.159950 | 2.720926  | 1.270831  |
| H  | -2.059155 | 3.537405  | 0.752200  |
| H  | -0.331635 | 1.919739  | 2.787890  |

CO+OH+H: -3890.598473a.u.

|    |           |           |           |
|----|-----------|-----------|-----------|
| Mo | 1.729969  | -1.306660 | 0.355979  |
| Mo | 2.162640  | 1.283642  | -0.205963 |
| Mo | 0.145282  | 0.150341  | 1.855305  |
| Mo | -0.922109 | -1.610347 | 0.078890  |
| Mo | 0.609855  | -0.359803 | -1.759972 |
| Mo | -0.915827 | 1.127948  | -0.180602 |
| S  | -1.813354 | -0.799993 | -2.057388 |
| S  | 0.713591  | -2.832579 | -1.278843 |
| S  | 3.069029  | -0.415503 | -1.542573 |
| S  | 0.541591  | 2.210127  | -1.708282 |
| S  | -0.396013 | 2.604639  | 1.773593  |
| S  | 2.518271  | 0.472345  | 2.016504  |
| S  | 0.388449  | -2.362581 | 2.072201  |
| S  | -2.274629 | -0.559907 | 1.802349  |
| Rh | -3.306247 | -0.032419 | -0.293462 |
| C  | -2.892788 | 2.018255  | -0.426941 |
| O  | -3.825222 | 2.710801  | -0.541165 |
| O  | 3.689974  | 2.408972  | -0.468147 |
| H  | 0.755837  | 3.260866  | 1.467801  |
| H  | 4.501013  | 2.090438  | -0.899587 |

TS4: -3890.511442a.u.

|    |           |           |           |
|----|-----------|-----------|-----------|
| Mo | 1.742191  | -1.352324 | 0.107021  |
| Mo | 2.092504  | 1.278146  | 0.128883  |
| Mo | 0.066163  | -0.315595 | 1.877881  |
| Mo | -0.909782 | -1.535818 | -0.303563 |
| Mo | 0.722263  | 0.017867  | -1.764222 |
| Mo | -0.957829 | 1.229034  | -0.015694 |
| S  | -1.672209 | -0.261345 | -2.267620 |
| S  | 0.791142  | -2.475056 | -1.844069 |
| S  | 3.167166  | -0.045106 | -1.492938 |
| S  | 0.541002  | 2.564550  | -1.276861 |
| S  | -0.657253 | 1.920698  | 2.174832  |
| S  | 2.387107  | 0.095756  | 2.199734  |
| S  | 0.368630  | -2.764578 | 1.525761  |
| S  | -2.336831 | -1.161672 | 1.601159  |
| Rh | -3.174076 | 0.016361  | -0.268099 |
| C  | -2.915133 | 2.110645  | -0.109521 |
| O  | -3.925436 | 2.689151  | -0.195610 |
| O  | 3.612841  | 2.660800  | 0.291575  |
| H  | 2.141881  | 2.890199  | 1.047624  |
| H  | 3.531610  | 3.443076  | -0.286563 |

CO+H<sub>2</sub>O: -3890.619343a.u.

|    |           |           |           |
|----|-----------|-----------|-----------|
| Mo | -1.906497 | -1.193555 | 0.190565  |
| Mo | -1.535804 | 1.311228  | -0.364416 |
| Mo | -0.346873 | -0.573956 | -1.788301 |
| Mo | 0.756299  | -1.597795 | 0.415810  |
| Mo | -0.607979 | 0.275703  | 1.832828  |
| Mo | 1.114228  | 1.225513  | -0.019388 |
| S  | 1.952565  | -0.149519 | 2.046378  |
| S  | -0.860993 | -2.164012 | 2.210601  |
| S  | -3.000389 | 0.596356  | 1.484957  |
| S  | -0.222024 | 2.663620  | 1.346320  |
| S  | 0.320583  | 1.725900  | -2.218958 |
| S  | -2.737900 | -0.212883 | -1.921032 |
| S  | -0.798661 | -2.945079 | -1.075196 |
| S  | 1.966566  | -1.585343 | -1.678081 |
| Rh | 3.173152  | -0.418992 | -0.073676 |
| C  | 2.691253  | 2.603788  | -0.094373 |
| O  | 3.566850  | 3.341665  | -0.139090 |
| O  | -2.762604 | 3.174923  | -0.942690 |
| H  | -2.312580 | 3.695333  | -1.630417 |
| H  | -2.858349 | 3.759422  | -0.171592 |

Mechanism C and D:

CO<sub>2</sub>+H<sub>2</sub>: -3890.605895a.u.

|    |           |           |           |
|----|-----------|-----------|-----------|
| Mo | 2.148030  | -0.891623 | -0.270225 |
| Mo | 1.537209  | 1.456402  | 0.654110  |
| Mo | 0.493225  | -0.728676 | 1.746306  |
| Mo | -0.446238 | -1.490136 | -0.652581 |
| Mo | 0.748807  | 0.705390  | -1.712635 |
| Mo | -1.019202 | 1.169521  | 0.198004  |
| S  | -1.735949 | -0.008809 | -2.117089 |
| S  | 1.264842  | -1.620800 | -2.443698 |
| S  | 3.088021  | 1.165847  | -1.240134 |
| S  | 0.143877  | 2.930300  | -0.850930 |
| S  | -0.417431 | 1.364876  | 2.481259  |
| S  | 2.826646  | -0.207307 | 2.006264  |
| S  | 1.170919  | -2.904469 | 0.692735  |
| S  | -1.747094 | -1.870907 | 1.341253  |
| Rh | -3.070708 | -0.636928 | -0.176232 |
| C  | -3.749831 | 1.210984  | 0.334512  |
| O  | -4.913076 | 0.859403  | 0.323873  |
| O  | -2.998992 | 2.182651  | 0.487022  |
| H  | 2.754089  | 2.861660  | 1.746078  |
| H  | 2.325106  | 3.341206  | 1.330452  |

TS1: -3890.554085a.u.

|    |           |           |           |
|----|-----------|-----------|-----------|
| Mo | 2.148784  | -0.941687 | -0.178181 |
| Mo | 1.599885  | 1.529322  | 0.427357  |
| Mo | 0.571972  | -0.473401 | 1.818349  |
| Mo | -0.479942 | -1.552013 | -0.444303 |
| Mo | 0.720455  | 0.443934  | -1.792666 |
| Mo | -1.012415 | 1.098094  | 0.153231  |
| S  | -1.749674 | -0.304718 | -2.110685 |
| S  | 1.212288  | -1.953926 | -2.209794 |
| S  | 3.073188  | 0.999424  | -1.430583 |
| S  | 0.025115  | 2.806376  | -1.239385 |
| S  | -0.247588 | 1.747099  | 2.273760  |
| S  | 2.917792  | 0.142867  | 1.948402  |
| S  | 1.138732  | -2.780003 | 1.058354  |
| S  | -1.750718 | -1.538686 | 1.611121  |
| Rh | -3.111668 | -0.649226 | -0.117589 |
| C  | -3.749265 | 1.235025  | 0.256235  |
| O  | -4.930736 | 0.954345  | 0.247945  |
| O  | -2.951161 | 2.177897  | 0.373238  |
| H  | 1.644242  | 3.116049  | 1.295967  |
| H  | 0.978349  | 3.357638  | -0.249362 |

CO<sub>2</sub>+2H: -3890.585098a.u.

|    |           |           |           |
|----|-----------|-----------|-----------|
| Mo | 2.132999  | -0.968211 | -0.034665 |
| Mo | 1.666176  | 1.539074  | 0.101197  |
| Mo | 0.593296  | -0.108060 | 1.849187  |
| Mo | -0.499534 | -1.623796 | -0.106142 |
| Mo | 0.649471  | 0.103482  | -1.849883 |
| Mo | -0.956369 | 1.067665  | 0.027462  |
| S  | -1.737576 | -0.729892 | -2.001514 |
| S  | 1.162466  | -2.339952 | -1.809280 |
| S  | 3.041633  | 0.676454  | -1.680988 |
| S  | -0.063281 | 2.509741  | -1.785255 |
| S  | -0.125256 | 2.282875  | 2.029265  |
| S  | 2.987950  | 0.479099  | 1.816744  |
| S  | 1.137038  | -2.529362 | 1.549969  |
| S  | -1.754122 | -1.018841 | 1.885328  |
| Rh | -3.164622 | -0.658348 | -0.030426 |
| C  | -3.713766 | 1.263366  | 0.056461  |
| O  | -4.914736 | 1.070947  | 0.057199  |
| O  | -2.870865 | 2.181089  | 0.083473  |
| H  | 0.968761  | 3.070039  | 1.683961  |
| H  | 1.011339  | 3.250776  | -1.307799 |

TS2: -3890.511225a.u.

|    |           |           |            |
|----|-----------|-----------|------------|
| Mo | 2.174652  | -0.769270 | 0.413631   |
| Mo | 1.502097  | 1.293288  | -1.007070  |
| Mo | 0.791126  | 1.125572  | 1.478772   |
| Mo | -0.397059 | -1.264831 | 0.996430   |
| Mo | 0.492909  | -1.101582 | -1.541960  |
| Mo | -1.033268 | 1.128808  | -0.396783  |
| S  | -1.901958 | -1.471667 | -0.535261  |
| S  | 1.197613  | -2.967010 | -0.024742  |
| S  | 2.791954  | -0.599657 | -1.990332  |
| S  | -0.556708 | 0.704615  | -2.685991  |
| S  | 0.175337  | 3.096926  | 0.130594   |
| S  | 3.115899  | 1.465935  | 0.830176   |
| S  | 1.343447  | -0.957194 | 2.717271   |
| S  | -1.706452 | 0.474781  | 2.075634   |
| Rh | -2.988650 | -0.628238 | 0.241996   |
| C  | -3.739317 | 1.147828  | -0.438897  |
| O  | -4.867847 | 0.824291  | -0.140575  |
| O  | -3.022741 | 2.068278  | -0.846659  |
| H  | -3.037889 | -1.091874 | -1.6136971 |

HCOO+H: -3890.542089a.u.

|    |           |           |           |
|----|-----------|-----------|-----------|
| Mo | 1.330919  | 1.540222  | -0.803557 |
| Mo | 2.237884  | -0.555102 | 0.394145  |
| Mo | 0.630634  | -0.910970 | -1.643849 |
| Mo | -1.196496 | 1.038603  | -0.432848 |
| Mo | 0.520858  | 0.963706  | 1.600561  |
| Mo | -0.176820 | -1.546830 | 0.790470  |
| S  | -1.781210 | -0.246601 | 2.057857  |
| S  | -0.261911 | 3.006874  | 0.493282  |
| S  | 2.800244  | 1.716584  | 1.155037  |
| S  | 1.406011  | -1.108643 | 2.650027  |
| S  | 1.683012  | -2.797157 | -0.334560 |
| S  | 2.868474  | -0.034263 | -1.952411 |
| S  | -0.500351 | 0.962891  | -2.671783 |
| S  | -1.397611 | -2.396531 | -1.053292 |
| Rh | -2.835166 | -0.891274 | 0.037953  |
| C  | -4.191426 | 1.606725  | -0.168975 |
| O  | -4.387320 | 0.444328  | 0.306870  |
| O  | -3.091542 | 2.095916  | -0.552054 |
| H  | -5.077747 | 2.250193  | -0.245884 |
| H  | -1.634539 | -0.058658 | -2.769003 |

TS3: -3890.577017a.u.

|    |           |           |           |
|----|-----------|-----------|-----------|
| Mo | -1.419292 | 1.189666  | -1.211249 |
| Mo | -2.229279 | -0.486532 | 0.588318  |
| Mo | -0.636243 | 1.407993  | 1.245293  |
| Mo | 1.116302  | 0.869360  | -0.635065 |
| Mo | -0.659737 | -1.343274 | -1.321668 |
| Mo | 0.325646  | -1.175002 | 1.162101  |
| S  | 1.668748  | -1.993779 | -0.348464 |
| S  | 0.517456  | 0.174325  | -2.791787 |
| S  | -2.935162 | -0.723341 | -1.776023 |
| S  | -1.527001 | -2.797270 | 0.548260  |
| S  | -1.278181 | -0.380937 | 2.863364  |
| S  | -2.938268 | 1.865686  | 0.596662  |
| S  | 0.125379  | 3.027625  | -0.451271 |
| S  | 1.759382  | 0.812344  | 2.021483  |
| Rh | 2.845493  | -0.918877 | 0.048354  |
| C  | 4.425151  | 1.516236  | -0.314427 |
| O  | 4.597846  | 0.281945  | -0.218505 |
| O  | 3.315622  | 2.134408  | -0.090648 |
| H  | 5.279523  | 2.142103  | -0.603216 |
| H  | 2.657755  | 1.550679  | 0.956992  |



HCOOH: -3890.607888a.u.

|    |           |           |           |
|----|-----------|-----------|-----------|
| Mo | 1.500283  | 0.213939  | 1.670170  |
| Mo | 2.154652  | 0.590211  | -0.804667 |
| Mo | 0.063278  | 1.837877  | 0.149442  |
| Mo | -0.860827 | -0.743201 | 1.082127  |
| Mo | 1.280017  | -1.711995 | -0.062873 |
| Mo | -0.298608 | -0.126759 | -1.636417 |
| S  | -1.077249 | -2.373123 | -0.963812 |
| S  | 0.632967  | -2.092344 | 2.306576  |
| S  | 3.454118  | -0.886076 | 0.673607  |
| S  | 1.794732  | -1.206820 | -2.437190 |
| S  | 0.849120  | 2.048965  | -2.231613 |
| S  | 2.293219  | 2.431046  | 0.841647  |
| S  | -0.901825 | 1.281594  | 2.301759  |
| S  | -2.063810 | 1.453284  | -1.225925 |
| Rh | -2.808405 | -0.685350 | -0.555317 |
| C  | -5.154332 | 0.659791  | 0.953168  |
| O  | -4.750636 | -0.333316 | 0.349652  |
| O  | -4.484563 | 1.765275  | 1.171750  |
| H  | -3.582354 | 1.704017  | 0.774150  |
| H  | -6.161594 | 0.694903  | 1.377187  |

TS4: -3890.563755a.u.

|    |           |           |           |
|----|-----------|-----------|-----------|
| Mo | 1.554592  | 1.609089  | -0.093098 |
| Mo | 2.176680  | -0.865656 | 0.247630  |
| Mo | 0.770807  | -0.233034 | -1.839679 |
| Mo | -1.031379 | 1.246623  | -0.237464 |
| Mo | 0.470515  | 0.211589  | 1.869395  |
| Mo | -0.352338 | -1.640020 | 0.145945  |
| S  | -1.861134 | -0.788100 | 1.871041  |
| S  | -0.193610 | 2.551440  | 1.527866  |
| S  | 2.821528  | 0.895523  | 1.874978  |
| S  | 1.155607  | -2.162346 | 2.058309  |
| S  | 1.431639  | -2.579012 | -1.339848 |
| S  | 3.091673  | 0.469480  | -1.642565 |
| S  | 0.051997  | 2.072320  | -2.164406 |
| S  | -1.505692 | -1.317598 | -1.980713 |
| Rh | -2.966505 | -0.678738 | -0.223378 |
| C  | -4.358978 | 0.684316  | 0.324466  |
| O  | -5.342550 | 0.275353  | 0.817732  |
| O  | -2.713172 | 2.393208  | -0.570846 |
| H  | -2.685411 | 3.298322  | -0.918379 |
| H  | -3.827183 | 1.722411  | -0.120725 |

CO+H<sub>2</sub>O (Mechanism C): -3890.617047a.u.

|    |           |           |           |
|----|-----------|-----------|-----------|
| Mo | -1.420849 | -0.659463 | -1.498297 |
| Mo | -2.098623 | 0.244297  | 0.821841  |
| Mo | -0.499259 | 1.686665  | -0.665942 |
| Mo | 1.163786  | -0.693012 | -0.922910 |
| Mo | -0.626102 | -1.843630 | 0.657980  |
| Mo | 0.478610  | 0.497868  | 1.557395  |
| S  | 1.823548  | -1.564914 | 1.484204  |
| S  | 0.056024  | -2.703905 | -1.555741 |
| S  | -2.954543 | -1.910130 | -0.038765 |
| S  | -1.193022 | -0.820271 | 2.849696  |
| S  | -1.220172 | 2.352597  | 1.658742  |
| S  | -2.824917 | 1.382693  | -1.246087 |
| S  | 0.540297  | 0.769608  | -2.672996 |
| S  | 2.024608  | 1.868923  | 0.537586  |
| Rh | 3.084951  | 0.365191  | 0.545645  |
| C  | 3.170700  | -1.190098 | -1.404566 |
| O  | 4.249734  | -1.457575 | -1.663527 |
| O  | -0.203558 | 3.810855  | -1.604279 |
| H  | -0.455675 | 3.830517  | -2.538602 |
| H  | 0.764760  | 3.967971  | -1.580739 |

TS5: -3890.486746 a.u.

|    |           |           |           |
|----|-----------|-----------|-----------|
| Mo | 1.251715  | 1.565396  | 0.695870  |
| Mo | 2.201422  | -0.699162 | -0.154975 |
| Mo | 0.722892  | 0.712432  | -1.695276 |
| Mo | -1.243126 | 1.114452  | 0.069209  |
| Mo | 0.373387  | -0.795455 | 1.705477  |
| Mo | -0.224760 | -1.651291 | -0.707318 |
| S  | -1.529286 | -2.392939 | 1.143255  |
| S  | -0.751937 | 1.176047  | 2.413020  |
| S  | 2.588727  | 0.082219  | 2.172278  |
| S  | 1.519837  | -2.836064 | 0.718262  |
| S  | 1.545094  | -1.500586 | -2.415808 |
| S  | 2.957805  | 1.449062  | -1.080568 |
| S  | -0.093489 | 2.905820  | -1.025212 |
| S  | -1.803536 | -0.382958 | -2.068583 |
| Rh | -2.906711 | -0.899310 | -0.027735 |
| C  | -3.353413 | 1.693920  | 0.055221  |
| O  | -4.121862 | 0.772310  | -0.304398 |
| O  | -1.415041 | 3.818895  | 1.063111  |
| H  | -3.840654 | 2.642886  | 0.346837  |
| H  | -1.297345 | 4.575693  | 0.448463  |

CHO+OH: -3890.553906a.u.

|    |           |           |           |
|----|-----------|-----------|-----------|
| Mo | -1.498882 | 1.630411  | -0.398929 |
| Mo | -1.973115 | -1.219156 | 0.117937  |
| Mo | -0.674800 | 0.215252  | 1.764019  |
| Mo | 1.118130  | 1.234263  | 0.066218  |
| Mo | -0.360030 | -0.504067 | -1.747175 |
| Mo | 0.655361  | -1.649726 | 0.387325  |
| S  | 1.906506  | -1.549543 | -1.682390 |
| S  | 0.488704  | 1.706318  | -2.171049 |
| S  | -2.750124 | -0.015552 | -1.865411 |
| S  | -0.906716 | -2.946474 | -1.160231 |
| S  | -1.040929 | -2.222580 | 2.138480  |
| S  | -3.042178 | 0.653210  | 1.330093  |
| S  | -0.204564 | 2.605473  | 1.516291  |
| S  | 1.852270  | -0.331666 | 2.061725  |
| Rh | 3.109643  | -0.358198 | -0.076161 |
| C  | 2.955654  | 2.374031  | 0.109839  |
| O  | 3.967455  | 1.657838  | -0.004120 |
| O  | -2.042997 | 3.378793  | -0.964598 |
| H  | 3.145110  | 3.464568  | 0.162391  |
| H  | -2.256029 | 4.037064  | -0.279185 |

TS6: -3890.532641a.u.

|    |           |           |           |
|----|-----------|-----------|-----------|
| Mo | 2.011601  | -1.105402 | 0.242010  |
| Mo | 1.622748  | 1.491366  | -0.032841 |
| Mo | 0.117388  | -0.082581 | 1.901271  |
| Mo | -0.475038 | -1.696946 | -0.111491 |
| Mo | 0.721949  | -0.123669 | -1.758817 |
| Mo | -1.193717 | 1.129271  | -0.077688 |
| S  | -1.676343 | -0.743470 | -2.090771 |
| S  | 1.263660  | -2.556854 | -1.595129 |
| S  | 3.149752  | 0.174611  | -1.537944 |
| S  | 0.214001  | 2.348345  | -1.560905 |
| S  | -0.995631 | 1.956791  | 2.096368  |
| S  | 2.516559  | 0.602789  | 2.173934  |
| S  | 0.777743  | -2.479055 | 1.900576  |
| S  | -2.209710 | -1.190127 | 1.491463  |
| Rh | -3.381152 | -0.278985 | -0.397194 |
| C  | -3.353204 | 1.699565  | -0.133130 |
| O  | -4.292250 | 2.399265  | -0.029803 |
| O  | 2.974558  | 2.836086  | -0.136556 |
| H  | -2.038505 | 2.626123  | -0.230441 |
| H  | 3.781824  | 2.760911  | -0.672274 |

CO+OH+H: -3890.598473a.u.

|    |           |           |           |
|----|-----------|-----------|-----------|
| Mo | 1.729969  | -1.306660 | 0.355979  |
| Mo | 2.162640  | 1.283642  | -0.205963 |
| Mo | 0.145282  | 0.150341  | 1.855305  |
| Mo | -0.922109 | -1.610347 | 0.078890  |
| Mo | 0.609855  | -0.359803 | -1.759972 |
| Mo | -0.915827 | 1.127948  | -0.180602 |
| S  | -1.813354 | -0.799993 | -2.057388 |
| S  | 0.713591  | -2.832579 | -1.278843 |
| S  | 3.069029  | -0.415503 | -1.542573 |
| S  | 0.541591  | 2.210127  | -1.708282 |
| S  | -0.396013 | 2.604639  | 1.773593  |
| S  | 2.518271  | 0.472345  | 2.016504  |
| S  | 0.388449  | -2.362581 | 2.072201  |
| S  | -2.274629 | -0.559907 | 1.802349  |
| Rh | -3.306247 | -0.032419 | -0.293462 |
| C  | -2.892788 | 2.018255  | -0.426941 |
| O  | -3.825222 | 2.710801  | -0.541165 |
| O  | 3.689974  | 2.408972  | -0.468147 |
| H  | 0.755837  | 3.260866  | 1.467801  |
| H  | 4.501013  | 2.090438  | -0.899587 |

TS7: -3890.511442a.u.

|    |           |           |           |
|----|-----------|-----------|-----------|
| Mo | 1.742191  | -1.352324 | 0.107021  |
| Mo | 2.092504  | 1.278146  | 0.128883  |
| Mo | 0.066163  | -0.315595 | 1.877881  |
| Mo | -0.909782 | -1.535818 | -0.303563 |
| Mo | 0.722263  | 0.017867  | -1.764222 |
| Mo | -0.957829 | 1.229034  | -0.015694 |
| S  | -1.672209 | -0.261345 | -2.267620 |
| S  | 0.791142  | -2.475056 | -1.844069 |
| S  | 3.167166  | -0.045106 | -1.492938 |
| S  | 0.541002  | 2.564550  | -1.276861 |
| S  | -0.657253 | 1.920698  | 2.174832  |
| S  | 2.387107  | 0.095756  | 2.199734  |
| S  | 0.368630  | -2.764578 | 1.525761  |
| S  | -2.336831 | -1.161672 | 1.601159  |
| Rh | -3.174076 | 0.016361  | -0.268099 |
| C  | -2.915133 | 2.110645  | -0.109521 |
| O  | -3.925436 | 2.689151  | -0.195610 |
| O  | 3.612841  | 2.660800  | 0.291575  |
| H  | 2.141881  | 2.890199  | 1.047624  |
| H  | 3.531610  | 3.443076  | -0.286563 |

CO+H<sub>2</sub>O: -3890.619343a.u.

|    |           |           |           |
|----|-----------|-----------|-----------|
| Mo | -1.906497 | -1.193555 | 0.190565  |
| Mo | -1.535804 | 1.311228  | -0.364416 |
| Mo | -0.346873 | -0.573956 | -1.788301 |
| Mo | 0.756299  | -1.597795 | 0.415810  |
| Mo | -0.607979 | 0.275703  | 1.832828  |
| Mo | 1.114228  | 1.225513  | -0.019388 |
| S  | 1.952565  | -0.149519 | 2.046378  |
| S  | -0.860993 | -2.164012 | 2.210601  |
| S  | -3.000389 | 0.596356  | 1.484957  |
| S  | -0.222024 | 2.663620  | 1.346320  |
| S  | 0.320583  | 1.725900  | -2.218958 |
| S  | -2.737900 | -0.212883 | -1.921032 |
| S  | -0.798661 | -2.945079 | -1.075196 |
| S  | 1.966566  | -1.585343 | -1.678081 |
| Rh | 3.173152  | -0.418992 | -0.073676 |
| C  | 2.691253  | 2.603788  | -0.094373 |
| O  | 3.566850  | 3.341665  | -0.139090 |
| O  | -2.762604 | 3.174923  | -0.942690 |
| H  | -2.312580 | 3.695333  | -1.630417 |
| H  | -2.858349 | 3.759422  | -0.171592 |
